# Supplementary material for: Expression of the immune checkpoint receptor TIGIT in Hodgkin’s lymphoma
Source: Springer Nature journal article supplement (doi:10.1186/s12885-018-5111-1), 2018-12-01

## Tonsilla palatina

1:70

TIGIT

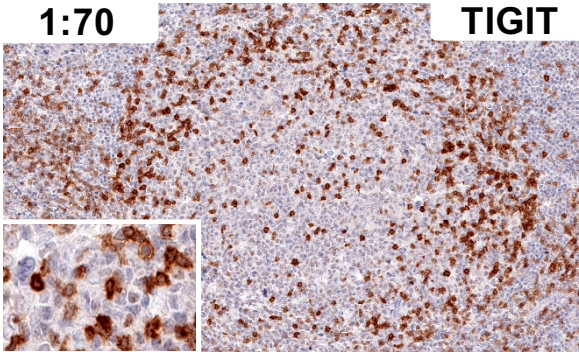

1:210

TIGIT

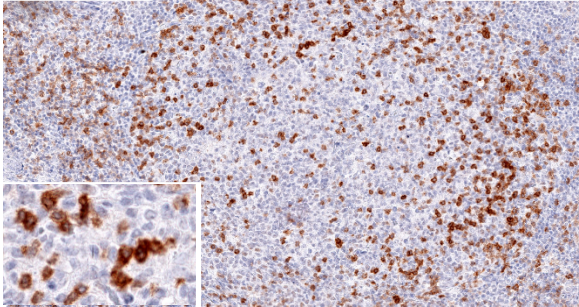

1:630

TIGIT

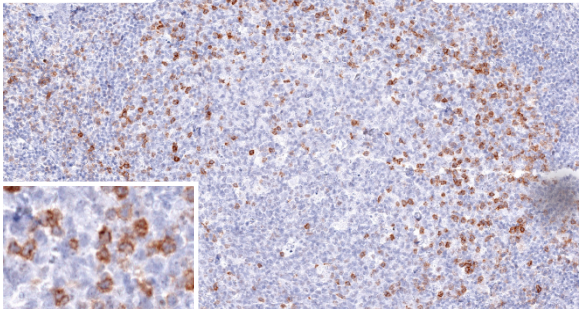

1:1890

TIGIT

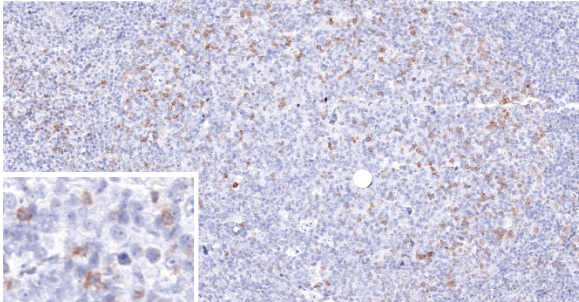

## Hodgkin lymphoma

1:70

TIGIT

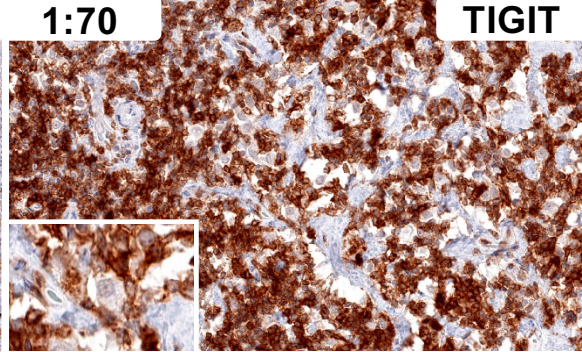

1:210

TIGIT

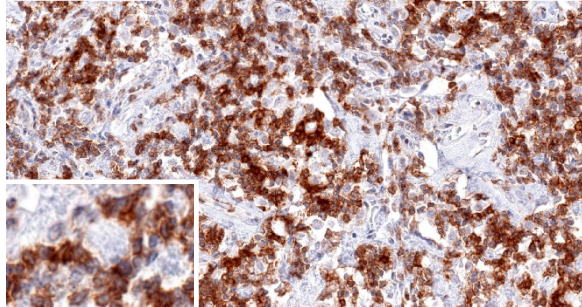

1:630

TIGIT

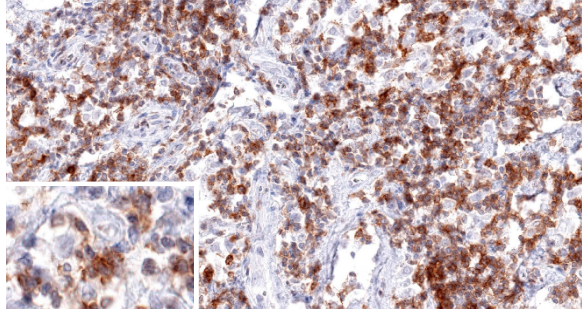

1:1890

TIGIT

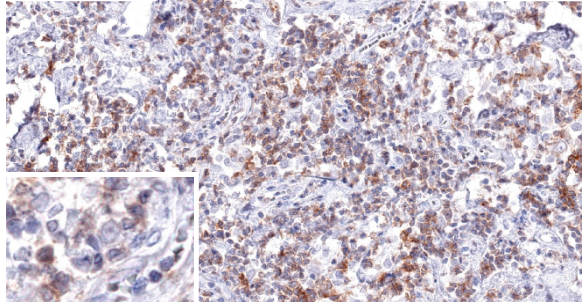

Supplement: MOESM1 [file 16314142]
